# Supplementary material for: The prognostic value of Epstein−Barr virus infection in Hodgkin lymphoma: A systematic review and meta-analysis
Source: PubMed Central journal article supplement (PMC9648611; doi:10.3389/fonc.2022.1034398), 2022-10-27

## Supplementary materials

**Table S1** Definitions of survival endpoints

**Table S2** Quality assessment of eligible studies using the Newcastle-Ottawa Scale (NOS)

**Fig S1 Sensitivity analysis** (a) Overall survival; (b) Failure free survival; (c) Event free survival; (d) Disease-specific survival; (e) Progression free survival

**Fig S2 Publication bias** (a) Overall survival; (b) Failure free survival; (c) Event free survival; (d) Disease-specific survival; (e) Progression free survival

**Table S1** *Definitions of survival endpoints*

| <b>Endpoints</b>          | <b>Definition</b>                                                                                                                             |
|---------------------------|-----------------------------------------------------------------------------------------------------------------------------------------------|
| Overall survival          | the date of diagnosis to death from any cause                                                                                                 |
| Event-free survival       | the date of diagnosis to any treatment failure including lymphoma progression, or discontinuation of treatment for any reason including death |
| Progression-free survival | the date of diagnosis to relapse, progression, or death from any cause                                                                        |
| Disease-specific survival | the date of diagnosis until the date of death as a result of a lymphoma-related cause                                                         |
| Failure-free survival     | the date of start of treatment to the date of treatment failure (progression or relapse) or death from HL, whichever was first.               |





**Fig S1(a)**

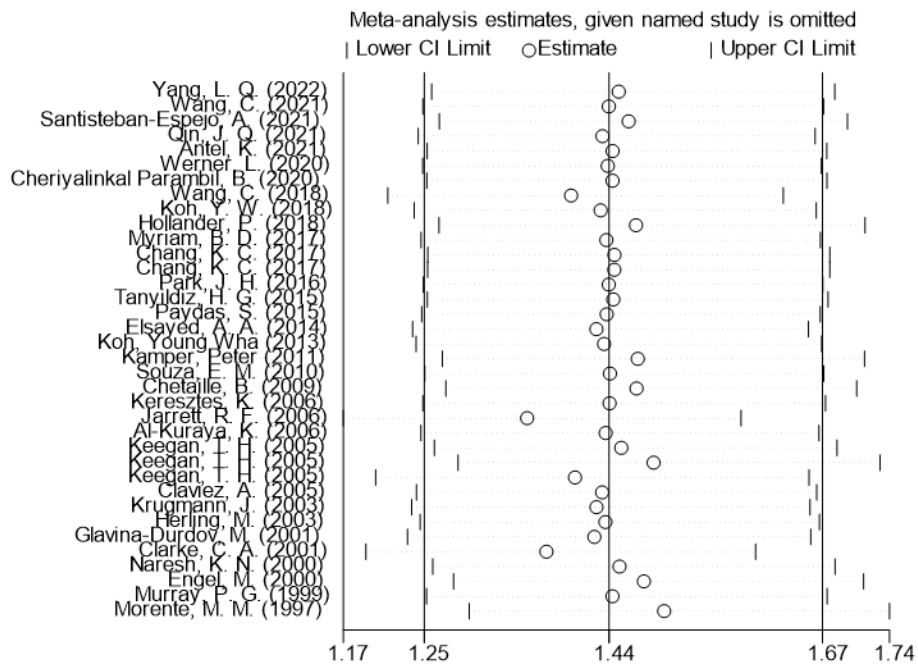

**Fig S1(b)**

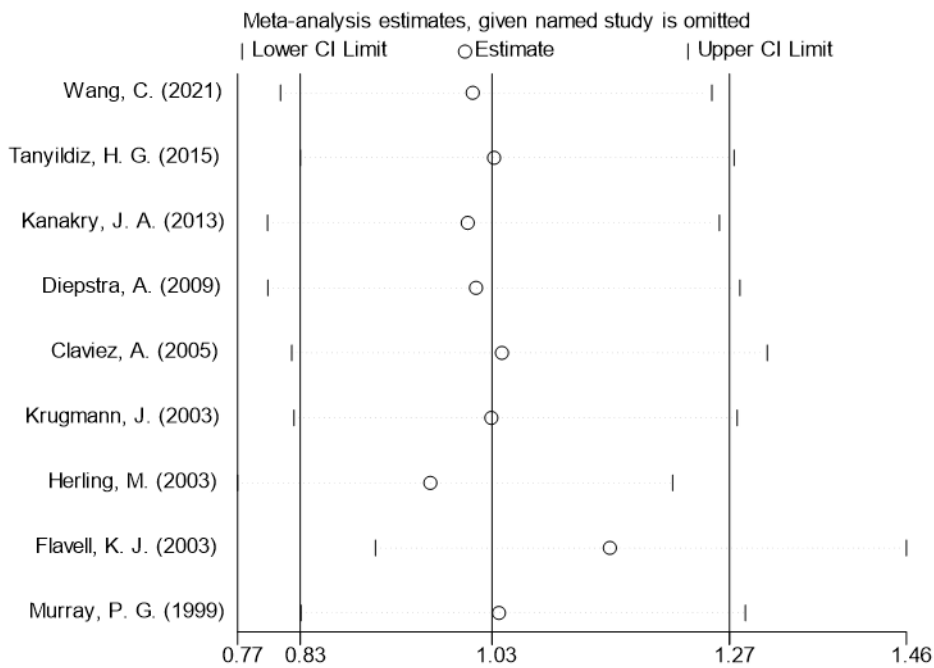

**Fig S1(c)**

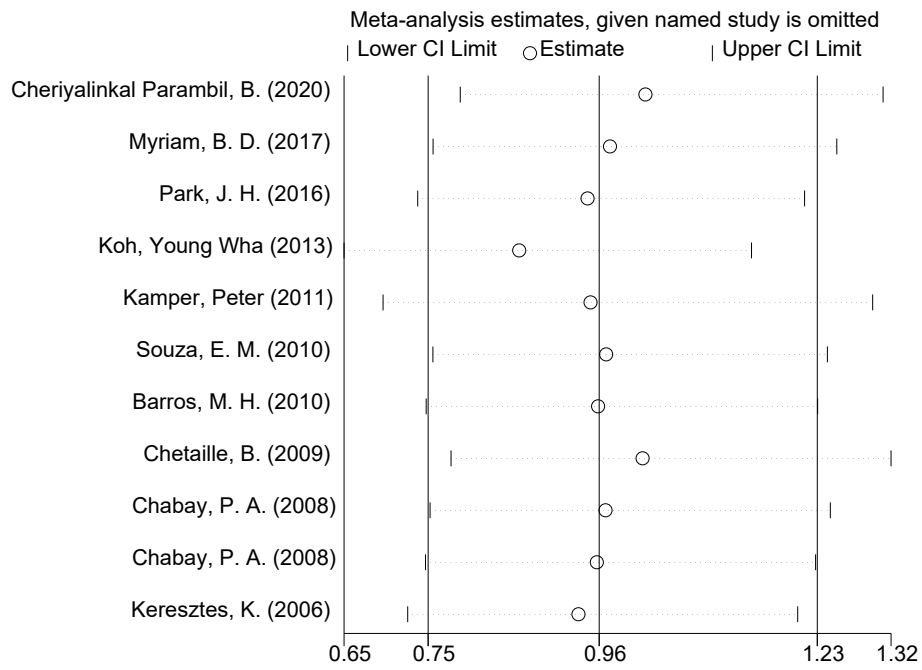

**Fig S1(d)**

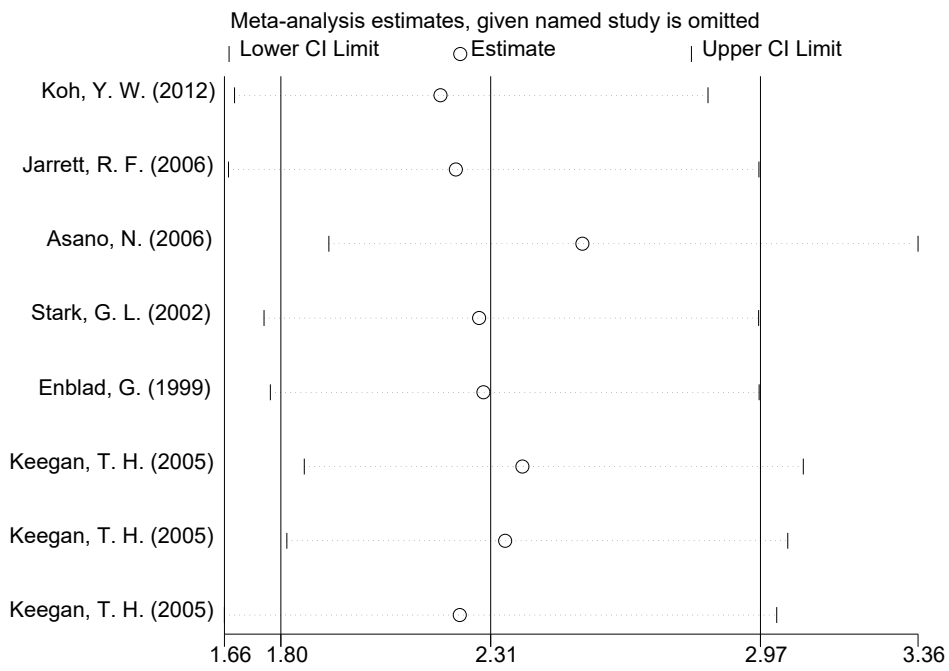

**Fig S1(e)**

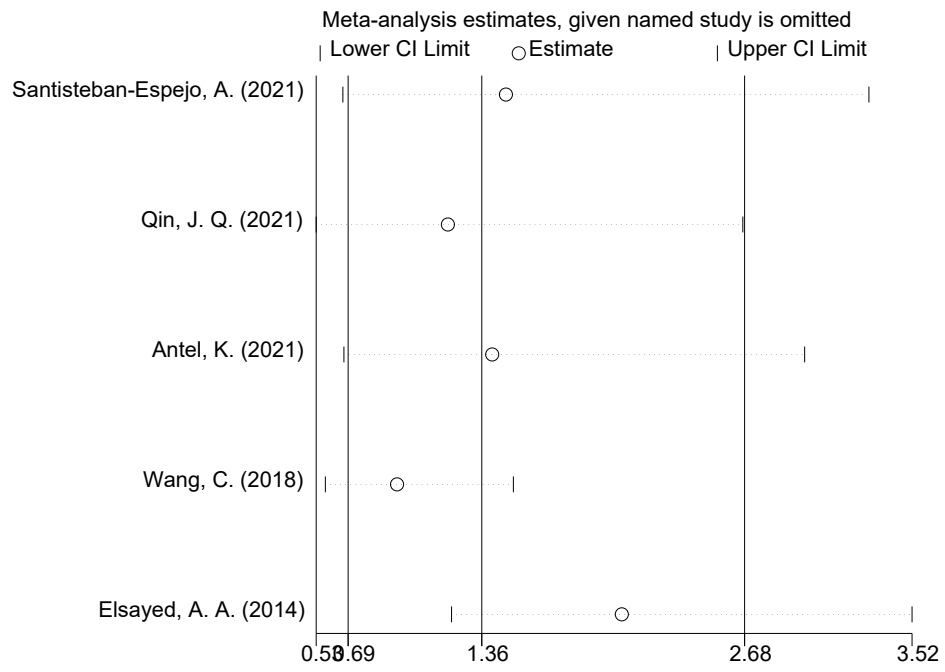

**Fig S2(a)**

**OS Begg's Test:  $p=0.406$**

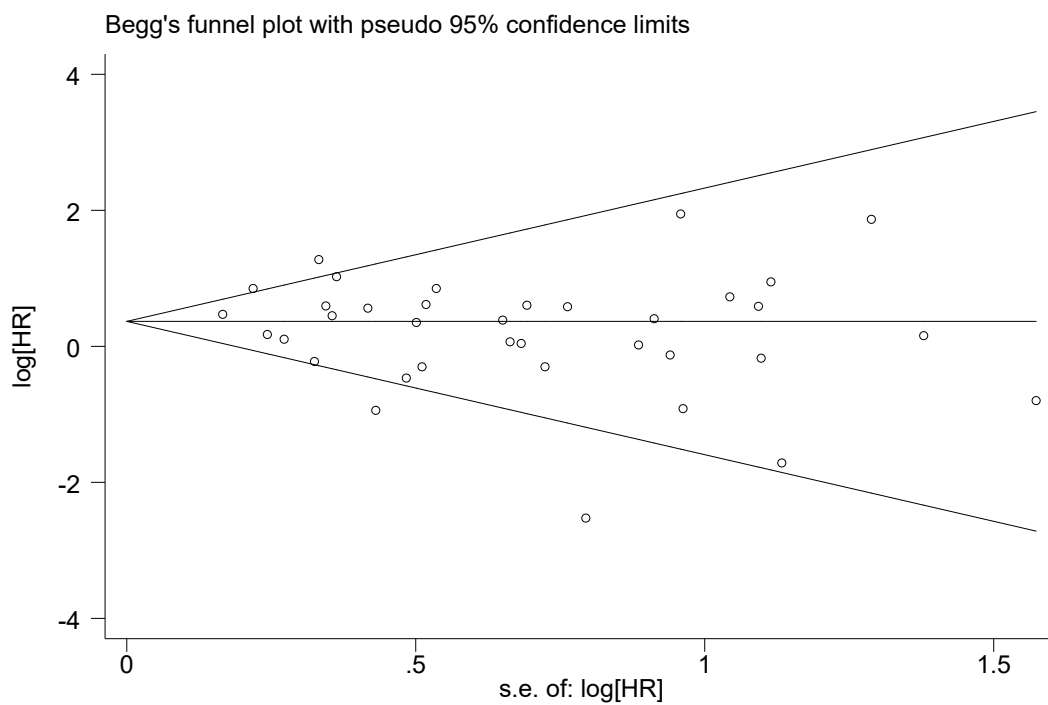

**OS Egger's test:  $p=0.162$**

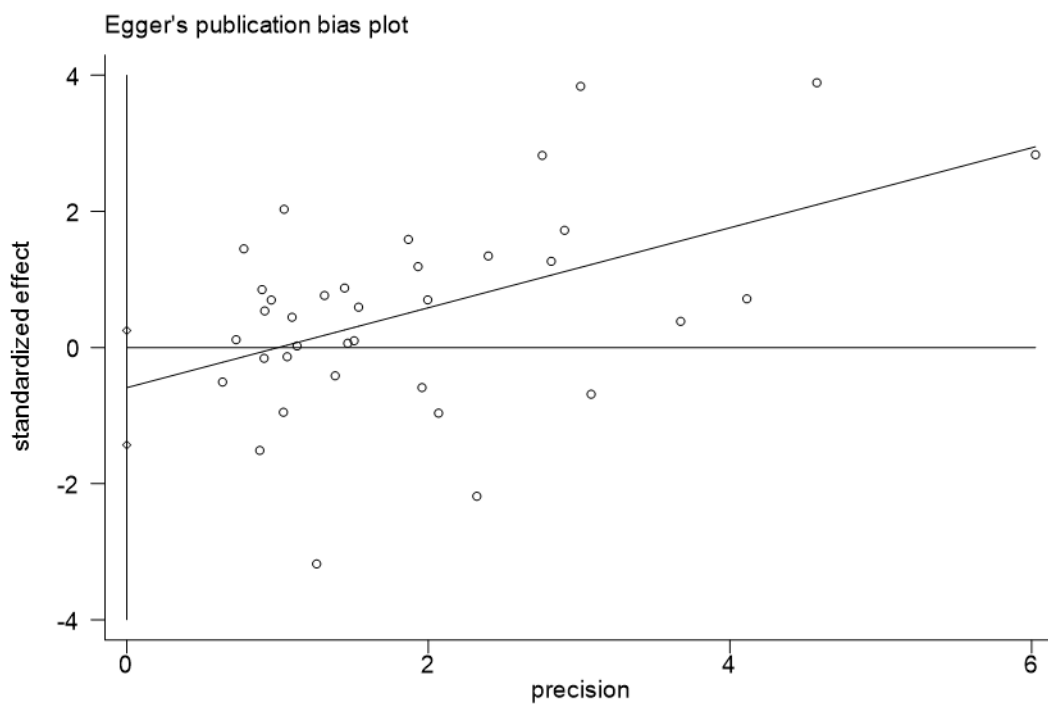



**Fig S2(b)**

**FFS Begg's test:  $p=0.917$**

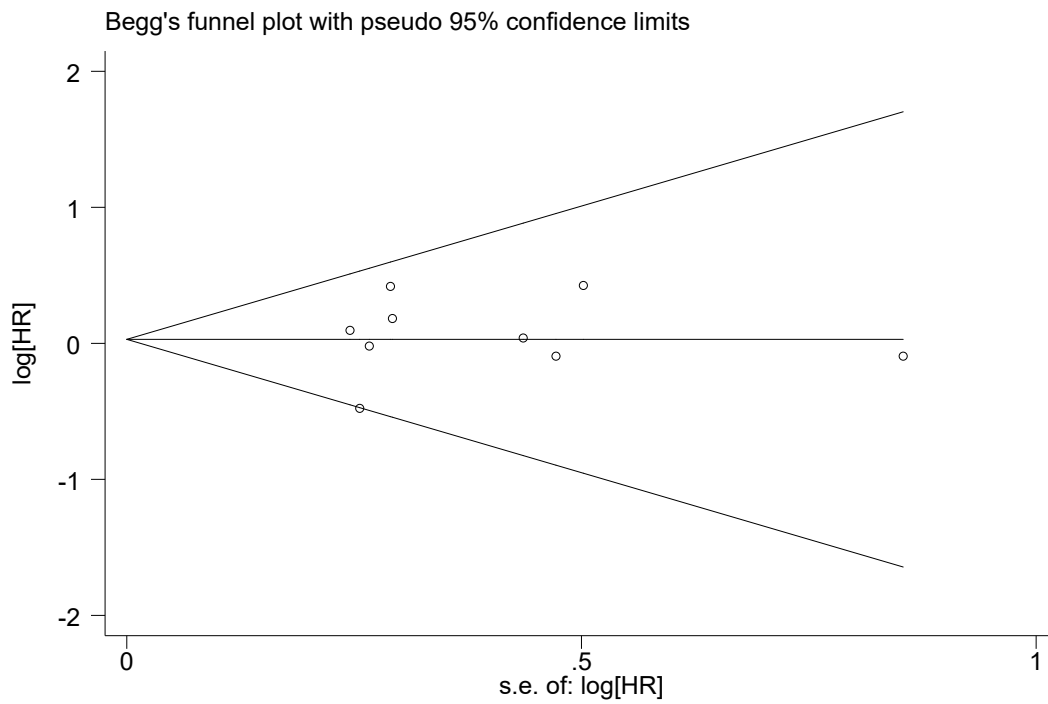

**FFS Egger's test:  $p=0.696$**

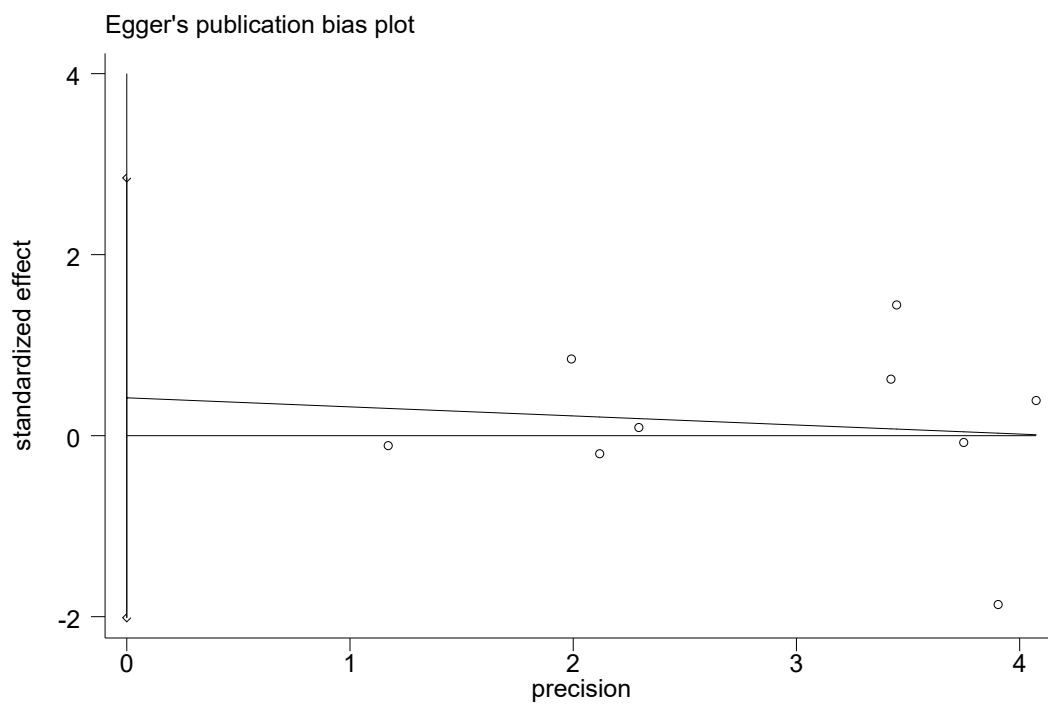

**Fig S2(c)**

**EFS Begg's test:  $p=0.876$**

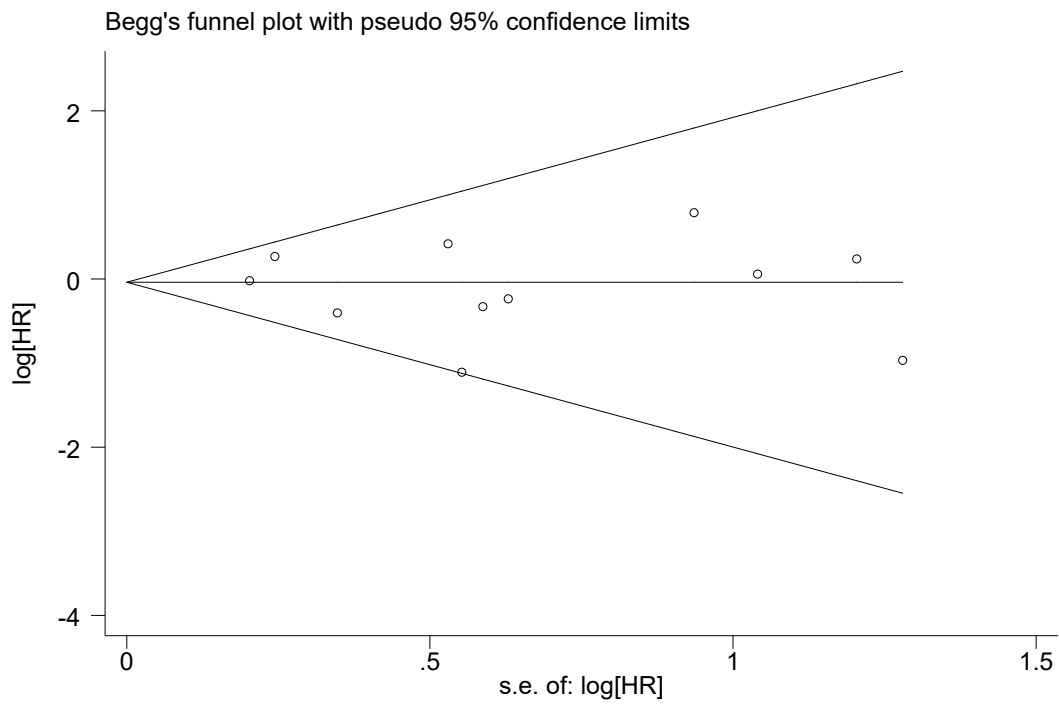

**EFS Egger's test:  $p=0.540$**

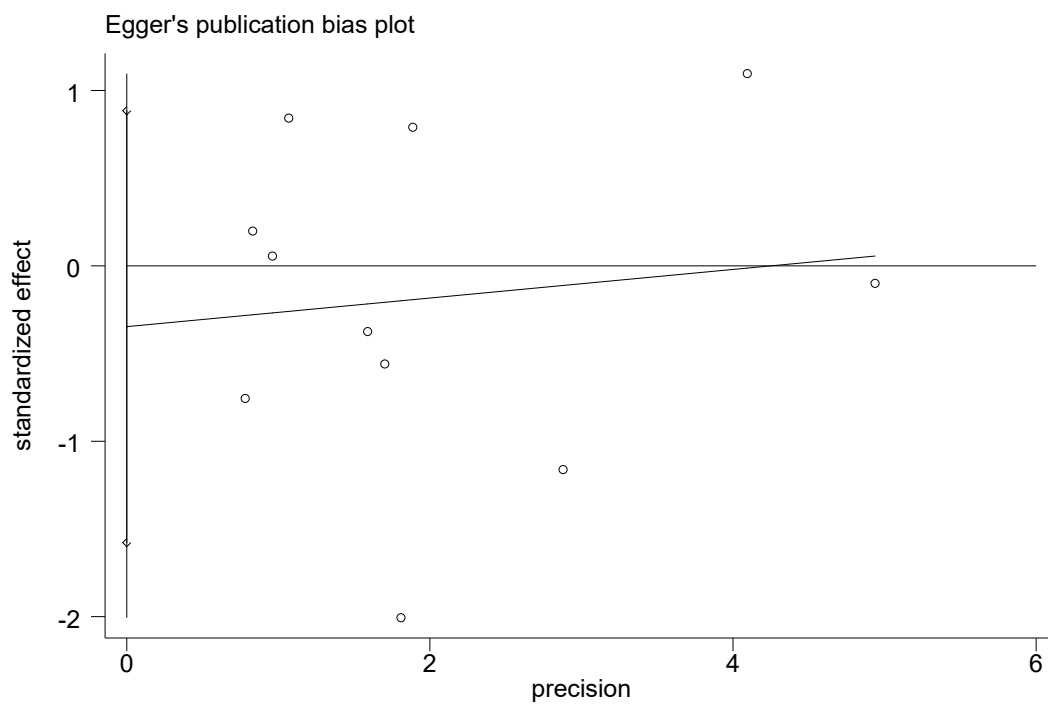

**Fig S2(d)**

**DSS Begg's test:  $p=0.266$**

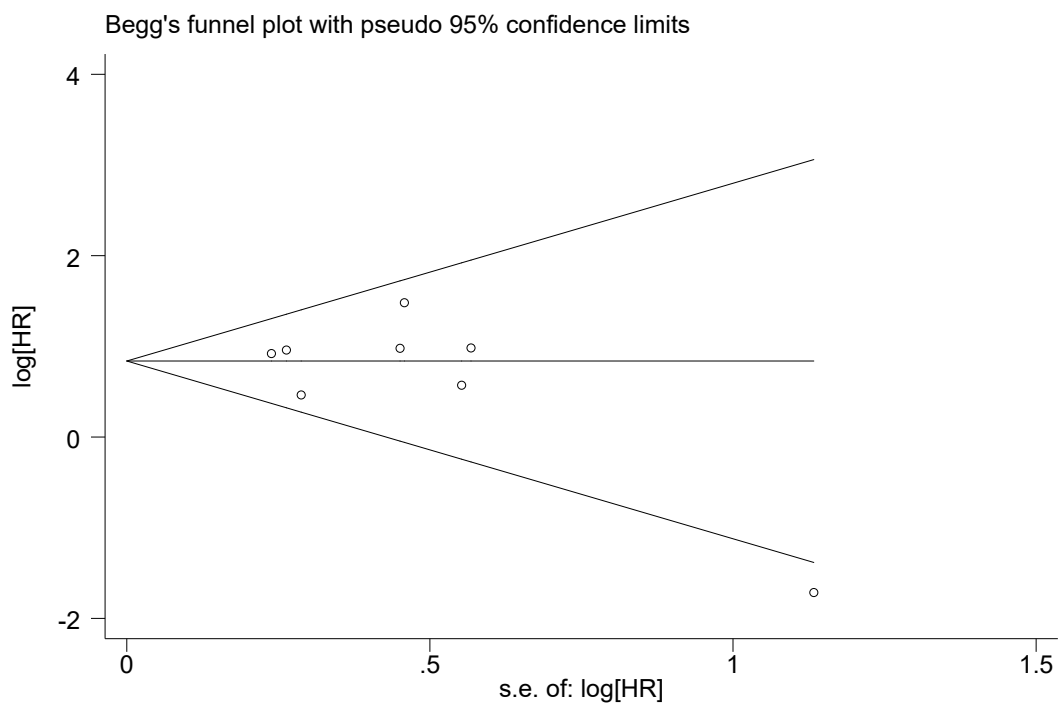

**EFS Egger's test:  $p=0.363$**

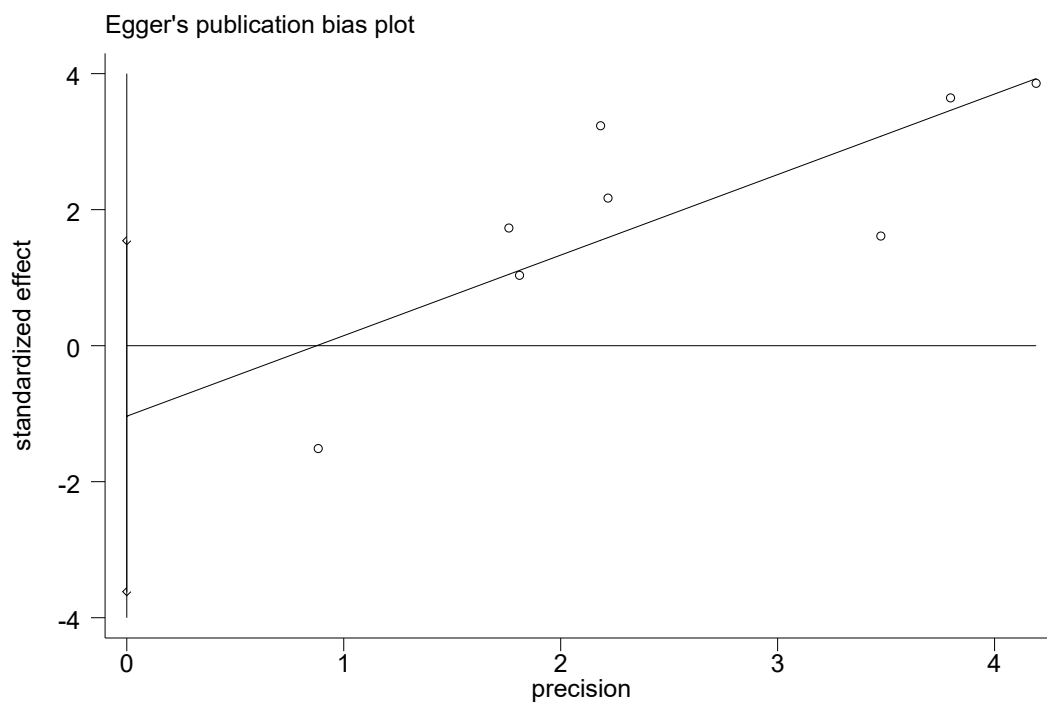

**Fig S2(e)**

**PFS Begg's test:  $p=1.000$**

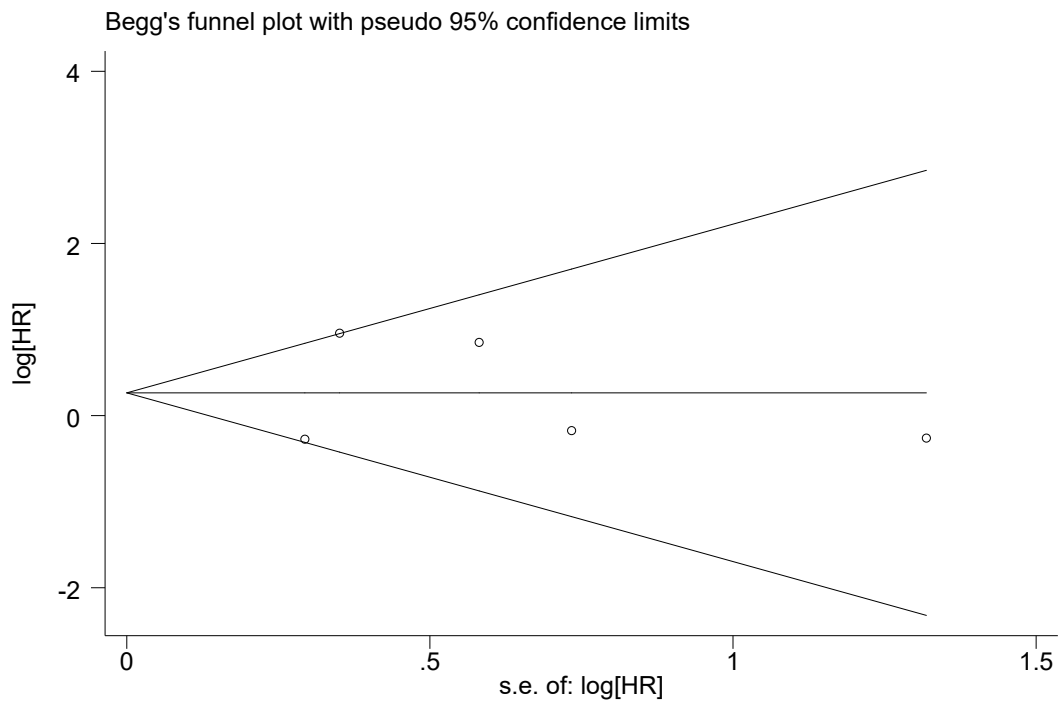

**PFS Egger's test:  $p=0.932$**

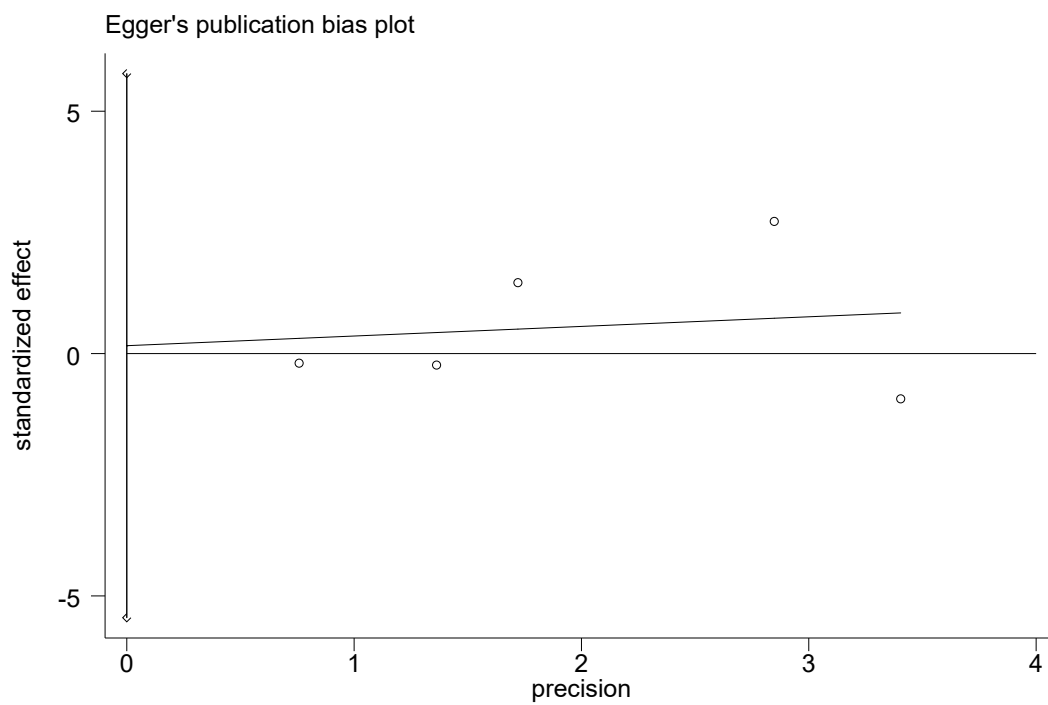

Supplement: DataSheet_1.pdf [file DataSheet_1.pdf]
